# Supplementary material for: Large-scale identification of chemically induced mutations in Drosophila melanogaster
Source: PubMed Central journal article supplement — Genome Res. 2014 Oct;24(10):1707–18. doi: 10.1101/gr.174615.114 (PMC4199363; doi:10.1101/gr.174615.114), 2014-10
Supplement: supp_gr.174615.114_REVHaelterman174615_Suppl_Fig1.pdf [file supp_gr.174615.114_REVHaelterman174615_Suppl_Fig1.pdf]

A

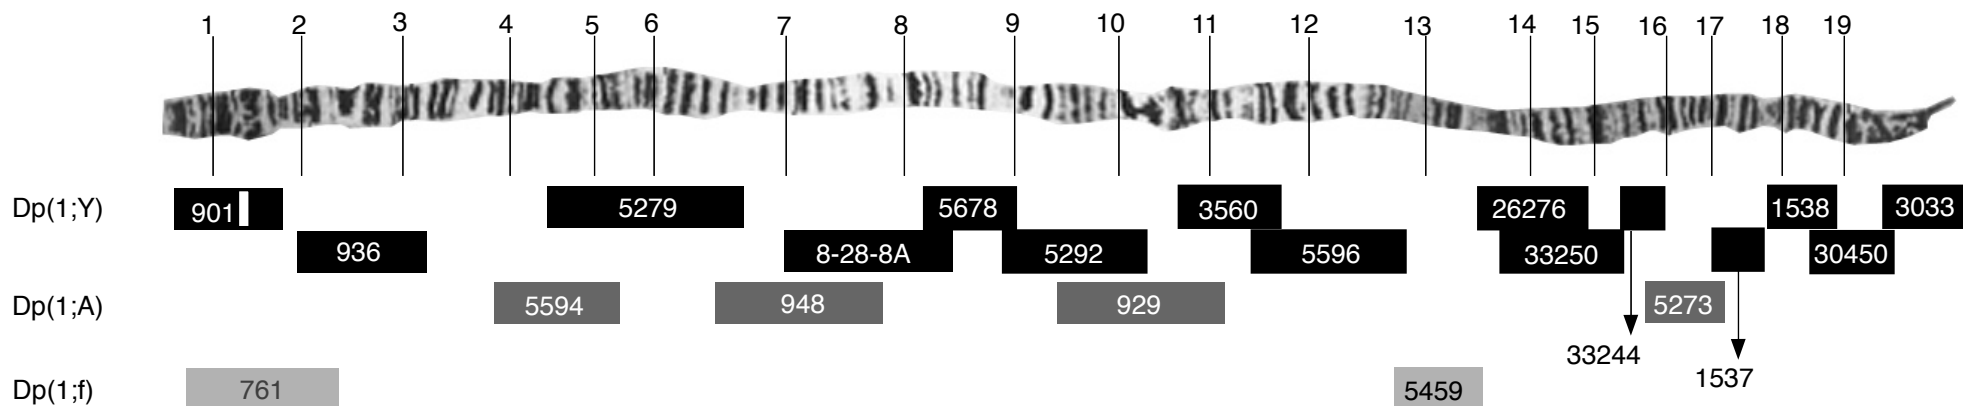

B

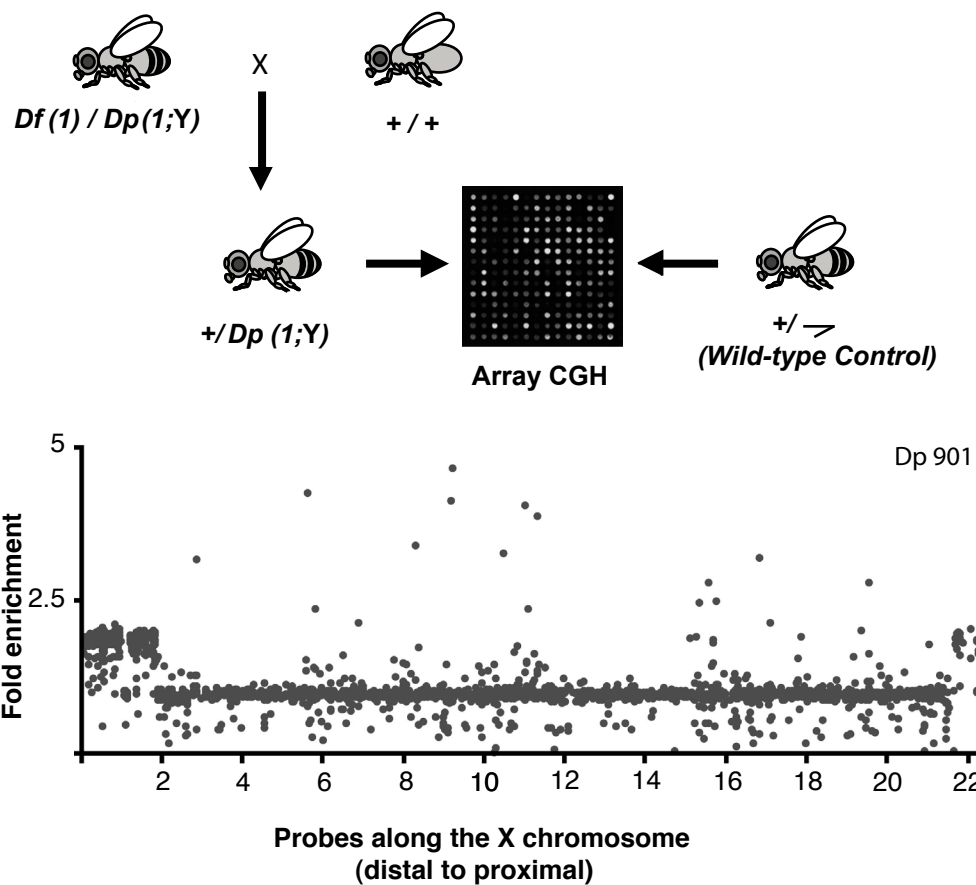

C

| Duplication | Flybase ID  | Molecular information | Molecular coverage                    |
|-------------|-------------|-----------------------|---------------------------------------|
| 901         | FBab0003240 | Array CGH             | tip - 1,030,000 & 1,184,000-1,836,000 |
| 761         | FBab0003209 | None                  | tip - 2,449,353                       |
| 936         | FBab0003209 | Array CGH             | 1,966,000 - 3,145,000                 |
| 5594        | FBab0022442 | None                  | 3,980,540 - 5,394,347                 |
| 5279        | FBab0028758 | Array CGH             | 4,520,000 - 6,780,000                 |
| 948         | FBab0009672 | None                  | 6,479,423 - 7,864,108                 |
| 8-28-8A     | N/A         | BSC Dp                | 6,927,931- 8,087,225                  |
| 5678        | FBab0029196 | Array CGH             | 8,270,000 - 9,056,000                 |
| 5292        | FBab0024503 | Array CGH             | 9,057,000 - 9,981,000                 |
| 929         | FBab0009493 | None                  | 9,681,025 - 11,416,938                |
| 3560        | FBab0003170 | Array CGH             | 10,690,000 - 11,741,000               |
| 5596        | FBab0029201 | Array CGH             | 11,387,000 - 12,871,000               |
| 5459        | FBab0003370 | Array CGH             | 12,973,240 - 13,315,057               |
| 26276       | FBab0003218 | Array CGH             | 13,621,236 -14,849,133                |
| 33250       | FBab0046956 | BSC Dp                | 13,724,330 - 15,392,986               |
| 33244       | FBab0046950 | BSC Dp                | 15,378,358 - 15,985,699               |
| 5273        | FBab0022449 | None                  | 15,689,039 - 17,251,295               |
| 1537        | FBab0022456 | Array CGH             | 16,960,000 - 17,736,000               |
| 1538        | FBab0003184 | Array CGH             | 17,795,000 - 18,980,000               |
| 30450       | FBab0046261 | BSC Dp                | 18,400,752 - 19,781,188               |
| 3033        | FBab0022466 | Array CGH             | 19,746,000 -base                      |
