# Supplementary material for: Large-scale identification of chemically induced mutations in Drosophila melanogaster
Source: PubMed Central journal article supplement — Genome Res. 2014 Oct;24(10):1707–18. doi: 10.1101/gr.174615.114 (PMC4199363; doi:10.1101/gr.174615.114), 2014-10
Supplement: supp_gr.174615.114_REVHaelterman174615_Suppl_Table1.pdf [file supp_gr.174615.114_REVHaelterman174615_Suppl_Table1.pdf]

|    | Gene Name | Flybase ID  |    | Gene Name | Flybase ID  |
|----|-----------|-------------|----|-----------|-------------|
| 1  | CG32580   | FBgn0052580 | 49 | CG42349   | FBgn0259680 |
| 2  | CG32602   | FBgn0052602 | 50 | CG12119   | FBgn0030102 |
| 3  | CG32767   | FBgn0052767 | 51 | CG8146    | FBgn0030869 |
| 4  | CG4211    | FBgn0004227 | 52 | CG18009   | FBgn0261793 |
| 5  | CG33235   | FBgn0030307 | 53 | CG32506   | FBgn0052506 |
| 6  | CG12179   | FBgn0025388 | 54 | CG3977    | FBgn0062413 |
| 7  | CG12047   | FBgn0002873 | 55 | CG32656   | FBgn0052656 |
| 8  | CG33247   | FBgn0053247 | 56 | CG32603   | FBgn0052603 |
| 9  | CG17762   | FBgn0030412 | 57 | CG6123    | FBgn0030913 |
| 10 | CG10993   | FBgn0030524 | 58 | CG12608   | FBgn0030630 |
| 11 | CG12184   | FBgn0025387 | 59 | CG32575   | FBgn0026575 |
| 12 | CG4353    | FBgn0010303 | 60 | CG15784   | FBgn0029766 |
| 13 | CG14226   | FBgn0043903 | 61 | CG5227    | FBgn0021764 |
| 14 | CG2658    | FBgn0024992 | 62 | CG2259    | FBgn0040319 |
| 15 | CG9065    | FBgn0030610 | 63 | CG15057   | FBgn0030908 |
| 16 | CG4206    | FBgn0024332 | 64 | CG3346    | FBgn0025739 |
| 17 | CG32498   | FBgn0000479 | 65 | CG15326   | FBgn0029965 |
| 18 | CG9224    | FBgn0003463 | 66 | CG4068    | FBgn0266000 |
| 19 | CG3929    | FBgn0000524 | 67 | CG2278    | FBgn0030017 |
| 20 | CG6211    | FBgn0261703 | 68 | CG34387   | FBgn0259108 |
| 21 | CG1705    | FBgn0002723 | 69 | CG3585    | FBgn0023458 |
| 22 | CG1543    | FBgn0010329 | 70 | CG17592   | FBgn0029711 |
| 23 | CG14225   | FBgn0031055 | 71 | CG13008   | FBgn0030780 |
| 24 | CG14219   | FBgn0031033 | 72 | CG32529   | FBgn0052529 |
| 25 | CG9509    | FBgn0030594 | 73 | CG3171    | FBgn0046687 |
| 26 | CG4607    | FBgn0029932 | 74 | CG2984    | FBgn0022768 |
| 27 | CG10742   | FBgn0040334 | 75 | CG42251   | FBgn0264542 |
| 28 | CG7058    | FBgn0030961 | 76 | CG15742   | FBgn0030462 |
| 29 | CG2256    | FBgn0029995 | 77 | CG33080   | FBgn0053080 |
| 30 | CG32564   | FBgn0052564 | 78 | CG15196   | FBgn0030296 |
| 31 | CG9807    | FBgn0030221 | 79 | CG13003   | FBgn0030798 |
| 32 | CG32706   | FBgn0052706 | 80 | CG3052    | FBgn0011277 |
| 33 | CG11584   | FBgn0030541 | 81 | CG32823   | FBgn0052823 |
| 34 | CG2871    | FBgn0029725 | 82 | CG32613   | FBgn0052613 |
| 35 | CG14438   | FBgn0029899 | 83 | CG9723    | FBgn0030768 |
| 36 | CG32601   | FBgn0052601 | 84 | CG14204   | FBgn0031032 |
| 37 | CG32511   | FBgn0052511 | 85 | CG12109   | FBgn0030054 |
| 38 | CG14410   | FBgn0030583 | 86 | CG3973    | FBgn0029881 |
| 39 | CG33962   | FBgn0014464 | 87 | CG9533    | FBgn0003301 |
| 40 | CG5010    | FBgn0260747 | 88 | CG1478    | FBgn0000359 |
| 41 | CG12655   | FBgn0031080 | 89 | CG12717   | FBgn0030420 |
| 42 | CG12181   | FBgn0003374 | 90 | CG42267   | FBgn0259162 |
| 43 | CG34434   | FBgn0250904 | 91 | CG34359   | FBgn0266375 |
| 44 | CG14200   | FBgn0031023 | 92 | CG8945    | FBgn0030839 |
| 45 | CG9176    | FBgn0263257 | 93 | CG11071   | FBgn0264981 |
| 46 | CG2233    | FBgn0029990 | 94 | CG15459   | FBgn0031108 |
| 47 | CG33667   | FBgn0053667 | 95 | CG5613    | FBgn0030839 |
| 48 | CG33665   | FBgn0053665 |    |           |             |
