# Supplementary material for: Large-scale identification of chemically induced mutations in Drosophila melanogaster
Source: PubMed Central journal article supplement — Genome Res. 2014 Oct;24(10):1707–18. doi: 10.1101/gr.174615.114 (PMC4199363; doi:10.1101/gr.174615.114), 2014-10
Supplement: supp_gr.174615.114_REVHaelterman174615_Suppl_Table2_part_1.pdf [file supp_gr.174615.114_REVHaelterman174615_Suppl_Table2_part_1.pdf]

Supplemental Table 2

| Flybase ID  | CG number | Gene symbol     | P[acman] duplication | first EMS allele? | Mutation                                    | Conserved in Humans? | Comment                                             |
|-------------|-----------|-----------------|----------------------|-------------------|---------------------------------------------|----------------------|-----------------------------------------------------|
| FBgn0027087 | CG6335    | <i>Aats-his</i> | Dp(1;3)DC347         | Yes               | D160V ; R213W                               | Yes                  |                                                     |
| FBgn0030089 | CG9113    | <i>AP-1γ</i>    | Dp(1;3)DC203         | No                | L133P ; Splice acceptor (9,006,195)         | Yes                  |                                                     |
| FBgn0017418 | CG5659    | <i>ari-1</i>    | Dp(1;3)DC342         | Yes               | C136Y                                       | Yes                  |                                                     |
| FBgn0000117 | CG11579   | <i>arm</i>      | Dp(1;3)DC034         | No                | S2C ; Q84X ; Q100X ; V144E ; D171N ; Q490X  | Yes                  |                                                     |
| FBgn0011742 | CG9901    | <i>Arp2</i>     | Dp(1;3)DC316         | Yes               | W89X                                        | Yes                  |                                                     |
| FBgn0030343 | CG1886    | <i>ATP7</i>     | Dp(1;3)DC245         | Yes               | R355X ; G579R ; V761D                       | Yes                  |                                                     |
| FBgn0000163 | CG5055    | <i>baz</i>      | Dp(1;3)DC530         | No                | <b>Y302X</b>                                | Yes                  | Other alleles of this compl. group could be rescued |
| FBgn0000173 | CG18319   | <i>ben</i>      | Dp(1;3)DC277         | No                | W129X ; P120L                               | Yes                  |                                                     |
| FBgn0000210 | CG11491   | <i>br</i>       | Dp(1;3)DC443         | No                | C665R                                       | No                   |                                                     |
| FBgn0030434 | CG4400    | <i>Brms1</i>    | Dp(1;3)DC261         | Yes               | K188X ; M1I and A235T                       | Yes                  |                                                     |
| FBgn0263111 | CG1522    | <i>cac</i>      | Dp(1;3)DC131         | Yes               | W623X                                       | Yes                  |                                                     |
| FBgn0015615 | CG9802    | <i>Cap</i>      | Dp(1;3)DC316         | Yes               | Q146X ; K575X                               | Yes                  |                                                     |
| FBgn0026143 | CG3658    | <i>CDC45L</i>   | Dp(1;3)DC100         | Yes               | <b>D99V</b>                                 | Yes                  | Other alleles of this compl. group could be rescued |
| FBgn0263237 | CG3319    | <i>Cdk7</i>     | Dp(1;3)DC136         | Yes               | E68K ; G200D ; <b>W228S</b>                 | Yes                  |                                                     |
| FBgn0000319 | CG9012    | <i>Chc</i>      | Dp(1;3)DC523         | No                | G314S ; Q498X                               | Yes                  |                                                     |
| FBgn0015024 | CG2028    | <i>Ckla</i>     | Dp(1;3)DC257         | Yes               | L141M ; G148S                               | Yes                  |                                                     |
| FBgn0000346 | CG1618    | <i>comt</i>     | Dp(1;3)DC266         | No                | L257Q                                       | Yes                  |                                                     |
| FBgn0029502 | CG14437   | <i>COQ7</i>     | Dp(1;3)DC486         | Yes               | W90X ; W118X                                | Yes                  |                                                     |
| FBgn0025864 | CG12737   | <i>Crag</i>     | Dp(1;3)DC499         | Yes               | W1306X ; splice donor (8,488,883)           | Yes                  |                                                     |
| FBgn0011576 | CG3466    | <i>Cyp4d2</i>   | Dp(1;3)DC039         | Yes               | K350X                                       | Yes                  |                                                     |
| FBgn0025641 | CG14622   | <i>DAAM</i>     | Dp(1;3)DC024         | Yes               | D360V                                       | Yes                  |                                                     |
| FBgn0001624 | CG1725    | <i>dlg1</i>     | Dp(1;3)DC238         | No                | Q551X ; splice donor (11,289,826)           | Yes                  |                                                     |
| FBgn0000520 | CG2711    | <i>dwg</i>      | Dp(1;3)DC406         | No                | <b>C363S ; H411L</b>                        | Yes                  | Both alleles fail to compl. <i>dwg</i> <sup>8</sup> |
| FBgn0029849 | CG3774    | <i>Efr</i>      | Dp(1;3)DC152         | Yes               | M216K                                       | Yes                  |                                                     |
| FBgn0001404 | CG9659    | <i>egh</i>      | Dp(1;3)DC046         | No                | D241N ; V333E                               | No                   |                                                     |
| FBgn0023512 | CG3806    | <i>elF2B-ε</i>  | Dp(1;3)DC034         | Yes               | Y534X                                       | Yes                  |                                                     |
| FBgn0029629 | CG8636    | <i>elF3-S4</i>  | Dp(1;3)DC046         | Yes               | K216X                                       | Yes                  |                                                     |
| FBgn0260400 | CG4262    | <i>elav</i>     | Dp(1;3)DC008         | Yes               | Q122X                                       | Yes                  |                                                     |
| FBgn0030092 | CG8971    | <i>fh</i>       | Dp(1;3)DC501         | Yes               | S45R                                        | Yes                  |                                                     |
| FBgn0000709 | CG1484    | <i>filI</i>     | Dp(1;3)DC379         | No                | A715V                                       | Yes                  |                                                     |
| FBgn0000711 | CG2096    | <i>flw</i>      | Dp(1;3)DC224         | No                | K156X                                       | Yes                  |                                                     |
| FBgn0004656 | CG2252    | <i>fs(1)h</i>   | Dp(1;3)DC184         | No                | <b>K1115X</b>                               | Yes                  | Other alleles of this compl. group could be rescued |
| FBgn0004598 | CG18734   | <i>Fur2</i>     | Dp(1;3)DC313         | Yes               | splice donor (16,269,894)                   | Yes                  |                                                     |
| FBgn0010391 | CG2522    | <i>Gtp-bp</i>   | Dp(1;3)DC234         | Yes               | V439D ; <b>splice acceptor (11,022,824)</b> | Yes                  |                                                     |
| FBgn0001189 | CG3095    | <i>hfw</i>      | Dp(1;3)DC029         | Yes               | W348X                                       | No                   |                                                     |
| FBgn0001565 | CG1666    | <i>Hlc</i>      | Dp(1;3)DC379         | Yes               | G58D                                        | Yes                  |                                                     |
| FBgn0004864 | CG1594    | <i>hop</i>      | Dp(1;3)DC238         | No                | G175R ; Q39X ; D1076N                       | Yes                  |                                                     |
| FBgn0264562 | CG16902   | <i>Hr4</i>      | Dp(1;3)DC035         | Yes               | <b>W728X ; Q867X ; W885X</b>                | Yes                  | All alleles fail to compl. <i>dHRA</i> <sup>1</sup> |
