# Supplementary material for: Large-scale identification of chemically induced mutations in Drosophila melanogaster
Source: PubMed Central journal article supplement — Genome Res. 2014 Oct;24(10):1707–18. doi: 10.1101/gr.174615.114 (PMC4199363; doi:10.1101/gr.174615.114), 2014-10
Supplement: supp_gr.174615.114_REVHaelterman174615_Suppl_Table2_part_2.pdf [file supp_gr.174615.114_REVHaelterman174615_Suppl_Table2_part_2.pdf]

Supplemental Table 2

| Flybase ID  | CG number | Gene symbol         | P[acman] duplication | first EMS allele? | Mutation                                                      | Conserved in Humans? | Comment                                             |
|-------------|-----------|---------------------|----------------------|-------------------|---------------------------------------------------------------|----------------------|-----------------------------------------------------|
| FBgn0001218 | CG4147    | <i>Hsc70-3</i>      | Dp(1;3)DC244         | Yes               | R181H                                                         | Yes                  |                                                     |
| FBgn0027108 | CG4590    | <i>Inx2</i>         | Dp(1;3)DC166         | Yes               | Q194X ;<br>C256S                                              | No                   |                                                     |
| FBgn0261955 | CG3861    | <i>kdn</i>          | Dp(1;3)DC154         | Yes               | W370R ;<br>K393X ;<br>H406L                                   | Yes                  |                                                     |
| FBgn0001341 | CG6189    | <i>l(1)1Bi</i>      | Dp(1;3)DC011         | Yes               | L285X ;<br>Q860X ;<br>Q1007L                                  | Yes                  |                                                     |
| FBgn0027291 | CG12233   | <i>l(1)G0156</i>    | Dp(1;3)DC363         | Yes               | Splice donor<br>(19,413,727)                                  | Yes                  |                                                     |
| FBgn0028343 | CG8465    | <i>l(1)G0222</i>    | Dp(1;3)DC331         | Yes               | L326H                                                         | Yes                  |                                                     |
| FBgn0028342 | CG2968    | <i>l(1)G0230</i>    | Dp(1;3)DC221         | Yes               | Q129X                                                         | Yes                  |                                                     |
| FBgn0028336 | CG4094    | <i>l(1)G0255</i>    | Dp(1;3)DC026         | Yes               | T132S ;<br>V141M ;<br>S172F ;<br>L390Q ;<br>I456N             | Yes                  |                                                     |
| FBgn0029870 | CG3869    | <i>Marf</i>         | Dp(1;3)DC154         | Yes               | S151C ;<br>A207V ;<br>E382K                                   | Yes                  |                                                     |
| FBgn0025815 | CG4039    | <i>Mcm6</i>         | Dp(1;3)DC160         | No                | L362P ;<br>Q510X                                              | Yes                  |                                                     |
| FBgn0004456 | CG1771    | <i>mew</i>          | Dp(1;3)DC266         | No                | R165X                                                         | Yes                  |                                                     |
| FBgn0030556 | CG1810    | <i>mRNA-cap</i>     | Dp(1;3)DC281         | Yes               | Y346X ;<br>V377D ;<br>W563X                                   | Yes                  |                                                     |
| FBgn0030552 | CG15871   | <i>mRpL38</i>       | Dp(1;3)DC280         | Yes               | Q88X ; splice<br>acceptor<br>(14,121,229)                     | Yes                  |                                                     |
| FBgn0030572 | CG14413   | <i>mRpS25</i>       | Dp(1;3)DC286         | Yes               | splice donor<br>(14,476,789)                                  | Yes                  |                                                     |
| FBgn0030692 | CG8470    | <i>mRpS30</i>       | Dp(1;3)DC305         | Yes               | splice donor<br>(15,680,664)                                  | Yes                  |                                                     |
| FBgn0020272 | CG1424    | <i>mst</i>          | Dp(1;3)DC380         | No                | V216E                                                         | Yes                  |                                                     |
| FBgn0002878 | CG11156   | <i>mus101</i>       | Dp(1;3)DC273         | No                | Q525X                                                         | Yes                  |                                                     |
| FBgn0260789 | CG12124   | <i>mxs</i>          | Dp(1;3)DC205         | No                | S 314X ;<br>Q520X ;<br>Q615X                                  | Yes                  |                                                     |
| FBgn0002914 | CG9045    | <i>Myb</i>          | Dp(1;3)DC523         | No                | G111X ;<br>R583X ;<br>X658L ; splice<br>donor<br>(15,749,822) | No                   |                                                     |
| FBgn0261617 | CG15319   | <i>nej</i>          | Dp(1;3)DC505         | No                | Y1001N ;<br>C1811Y                                            | Yes                  | both alleles fail to compl. <i>nej</i> <sup>3</sup> |
| FBgn0023542 | CG3460    | <i>Nmd3</i>         | Dp(1;3)DC039         | Yes               | V416E                                                         | Yes                  |                                                     |
| FBgn0263968 | CG32743   | <i>nonC</i>         | Dp(1;3)DC163         | Yes               | A928V                                                         | Yes                  |                                                     |
| FBgn0027537 | CG11092   | <i>Nup93-1</i>      | Dp(1;3)DC275         | Yes               | K239X                                                         | Yes                  |                                                     |
| FBgn0004102 | CG12154   | <i>oc</i>           | Dp(1;3)DC572         | No                | Q469X ;<br>splice<br>acceptor<br>(8,527,997)                  | Yes                  |                                                     |
| FBgn0264255 | CG9907    | <i>para</i>         | Dp(1;3)DC134         | Yes               | N343I ;<br>V1424E                                             | Yes                  |                                                     |
| FBgn0013720 | CG14779   | <i>pck</i>          | Dp(1;3)DC401         | No                | P50L                                                          | Yes                  |                                                     |
| FBgn0004654 | CG3724    | <i>Pgd</i>          | Dp(1;3)DC038         | No                | R286X                                                         | Yes                  |                                                     |
| FBgn0003079 | CG2845    | <i>phl</i>          | Dp(1;3)DC404         | No                | K140X ;<br>E595K                                              | Yes                  |                                                     |
| FBgn0261922 | CG10260   | <i>PI4KIIIalpha</i> | Dp(1;3)DC048         | Yes               | P562L ;<br>W879X                                              | Yes                  |                                                     |
| FBgn0004957 | CG6205    | <i>por</i>          | Dp(1;3)DC346         | No                | R135X                                                         | Yes                  |                                                     |
| FBgn0250871 | CG2467    | <i>pot</i>          | Dp(1;3)DC246         | Yes               | K551X                                                         | No                   |                                                     |
| FBgn0003139 | CG12217   | <i>PpV</i>          | Dp(1;3)DC154         | Yes               | H112L ; I117F ;<br>G162S ;<br>W203R                           | Yes                  |                                                     |
| FBgn0004066 | CG3422    | <i>Prosa4</i>       | Dp(1;3)DC312         | Yes               | G37R ;<br>splicing<br>acceptor<br>(16,170,923)                | Yes                  |                                                     |
| FBgn0030196 | CG2222    | <i>Psf3</i>         | Dp(1;3)DC223         | Yes               | Q141X                                                         | Yes                  |                                                     |
