# Supplementary material for: Large-scale identification of chemically induced mutations in Drosophila melanogaster
Source: PubMed Central journal article supplement — Genome Res. 2014 Oct;24(10):1707–18. doi: 10.1101/gr.174615.114 (PMC4199363; doi:10.1101/gr.174615.114), 2014-10
Supplement: supp_gr.174615.114_REVHaelterman174615_Suppl_Table2_part_3.pdf [file supp_gr.174615.114_REVHaelterman174615_Suppl_Table2_part_3.pdf]

Supplemental Table 2

| Flybase ID  | CG number | Gene symbol                            | P[acman] duplication | first EMS allele? | Mutation                                                                                | Conserved in Humans? | Comment                                                                                                                |
|-------------|-----------|----------------------------------------|----------------------|-------------------|-----------------------------------------------------------------------------------------|----------------------|------------------------------------------------------------------------------------------------------------------------|
| FBgn0023458 | CG3585    | <i>Rbcn-3A</i>                         | Dp(1;3)DC152         | Yes               | Q41X and R1802L ; C288X ; W291X ; F2361I                                                | Yes                  |                                                                                                                        |
| FBgn0023510 | CG17766   | <i>Rbcn-3B</i>                         | Dp(1;3)DC034         | Yes               | <u>Q777X</u> ; Y882X ; <u>K895X</u> ; W1254X ; R1294X                                   | Yes                  |                                                                                                                        |
| FBgn0015799 | CG7413    | <i>Rbf</i>                             | Dp(1;3)DC013         | No                | K119X ; S185M and I187V ; K458X ; splice acceptor (693,047) ; splice acceptor (694,100) | Yes                  |                                                                                                                        |
| FBgn0026374 | CG8497    | <i>Rhp</i>                             | Dp(1;3)DC305         | Yes               | M1K                                                                                     | Yes                  |                                                                                                                        |
| FBgn0003277 | CG1554    | <i>RpII215</i>                         | Dp(1;3)DC241         | No                | V785E                                                                                   | Yes                  |                                                                                                                        |
| FBgn0002590 | CG8922    | <i>RpS5a</i>                           | Dp(1;3)DC325         | No                | Y80X                                                                                    | Yes                  |                                                                                                                        |
| FBgn0029755 | CG4202    | <i>Sas10</i>                           | Dp(1;3)DC130         | Yes               | Q177X                                                                                   | Yes                  |                                                                                                                        |
| FBgn0040918 | CG3576    | <i>schlank</i>                         | Dp(1;3)DC152         | Yes               | M1I ; S344P                                                                             | Yes                  |                                                                                                                        |
| FBgn0021765 | CG7113    | <i>scu</i>                             | Dp(1;3)DC341         | Yes               | V52E ; Q159X ; S165F                                                                    | Yes                  |                                                                                                                        |
| FBgn0052654 | CG32654   | <i>Sec16</i>                           | Dp(1;3)DC256         | Yes               | P1926S                                                                                  | Yes                  |                                                                                                                        |
| FBgn0003371 | CG2621    | <i>sgg</i>                             | Dp(1;3)DC048         | Yes               | V68E ; Q70X ; P223L                                                                     | Yes                  |                                                                                                                        |
| FBgn0003392 | CG18102   | <i>shi</i>                             | Dp(1;3)DC133         | No                | K10X ; G55D ; P221L ; L350H ; L280Q ; K727X                                             | Yes                  |                                                                                                                        |
| FBgn0030352 | CG15738   | <i>sicily</i>                          | Dp(1;3)DC246         | Yes               | splice acceptor (11,787,621)                                                            | Yes                  |                                                                                                                        |
| FBgn0025637 | CG16983   | <i>skpA</i>                            | Dp(1;3)DC010         | Yes               | K22X                                                                                    | Yes                  |                                                                                                                        |
| FBgn0025800 | CG2262    | <i>Smox</i>                            | Dp(1;3)DC185         | Yes               | Q313X ; <u>K394X</u>                                                                    | Yes                  |                                                                                                                        |
| FBgn0265523 | CG4013    | <i>Smr</i>                             | Dp(1;3)DC258         | Yes               | Q1655X ; K1996X ; Q2002X ; <u>R2567X</u>                                                | Yes                  |                                                                                                                        |
| FBgn0023169 | CG3051    | <i>SNF1A (AMPK<math>\alpha</math>)</i> | Dp(1;3)DC102         | No                | D188L                                                                                   | Yes                  | alleles of this compl. group fail to compl. <i>SNF1A</i> <sup>1</sup> and can be rescued by a genomic rescue construct |
| FBgn0020378 | CG1343    | <i>Sp1</i>                             | Dp(1;3)DC212         | Yes               | Q8X ; C197S                                                                             | Yes                  |                                                                                                                        |
| FBgn0045073 | CG9126    | <i>Stim</i>                            | Dp(1;3)DC307         | Yes               | W202X ; V279D ; K426X ; R492X                                                           | Yes                  |                                                                                                                        |
| FBgn0004648 | CG4122    | <i>svr</i>                             | Dp(1;3)DC008         | Yes               | S950T                                                                                   | Yes                  |                                                                                                                        |
| FBgn0260938 | CG9056    | <i>tay</i>                             | Dp(1;3)DC133         | No                | R990X                                                                                   | Yes                  |                                                                                                                        |
| FBgn0027296 | CG3073    | <i>temp</i>                            | Dp(1;3)DC039         | Yes               | Q190X                                                                                   | Yes                  |                                                                                                                        |
| FBgn0010416 | CG9984    | <i>TH1</i>                             | Dp(1;3)DC313         | Yes               | Q100X ; R149X ; splice donor (16,284,495)                                               | Yes                  |                                                                                                                        |
| FBgn0003714 | CG7925    | <i>tko</i>                             | Dp(1;3)DC452         | No                | Q6X ; L85H                                                                              | Yes                  |                                                                                                                        |
| FBgn0023518 | CG3848    | <i>trr</i>                             | Dp(1;3)DC034         | Yes               | W155X and S115T ; K512X ; R1477X                                                        | Yes                  |                                                                                                                        |
| FBgn0031057 | CG14224   | <i>Ubqn</i>                            | Dp(1;3)DC550         | Yes               | Q129X                                                                                   | Yes                  |                                                                                                                        |
| FBgn0030354 | CG1559    | <i>Upf1</i>                            | Dp(1;3)DC246         | Yes               | W120X ; I486N ; Q586X                                                                   | Yes                  |                                                                                                                        |
