# Supplementary material for: Large-scale identification of chemically induced mutations in Drosophila melanogaster
Source: PubMed Central journal article supplement — Genome Res. 2014 Oct;24(10):1707–18. doi: 10.1101/gr.174615.114 (PMC4199363; doi:10.1101/gr.174615.114), 2014-10
Supplement: supp_gr.174615.114_REVHaelterman174615_Suppl_Table2_part_4.pdf [file supp_gr.174615.114_REVHaelterman174615_Suppl_Table2_part_4.pdf]

Supplemental Table 1

| Flybase ID  | CG number | Gene symbol                    | P[acman] duplication | first EMS allele? | Mutation                                                 | Conserved in Humans? | Comment |
|-------------|-----------|--------------------------------|----------------------|-------------------|----------------------------------------------------------|----------------------|---------|
| FBgn0029711 | CG17592   | <i>Usf</i>                     | Dp(1;3)DC118         | Yes               | Y248N                                                    | Yes                  |         |
| FBgn0030366 | CG1490    | <i>Usp7</i>                    | Dp(1;3)DC247         | Yes               | Y474N ;<br>Q301X                                         | Yes                  |         |
| FBgn0261930 | CG6172    | <i>vnd</i>                     | Dp(1;3)DC009         | Yes               | splice<br>acceptor<br>(487,679)                          | Yes                  |         |
| FBgn0014411 | CG14804   | <i>Vps26</i>                   | Dp(1;3)DC033         | Yes               | K264X ;<br>V267D                                         | Yes                  |         |
| FBgn0004655 | CG3707    | <i>wapl</i>                    | Dp(1;3)DC038         | No                | Y842X ;<br>Q1418X ;<br>splice<br>acceptor<br>(2,045,880) | Yes                  |         |
| FBgn0040066 | CG17437   | <i>wds</i>                     | Dp(1;3)DC046         | Yes               | G132D                                                    | Yes                  |         |
| FBgn0030805 | CG9089    | <i>wus</i>                     | Dp(1;3)DC322         | Yes               | Q307X and<br>I375V                                       | Yes                  |         |
| FBgn0260858 | CG1515    | <i>Ykt6</i>                    | Dp(1;3)DC495         | Yes               | Q62R ; M1I                                               | Yes                  |         |
| FBgn0030096 | CG9060    | <i>Zpr1</i>                    | Dp(1;3)DC204         | Yes               | C46S ; <b>splice<br/>acceptor<br/>(9,055,222)</b>        | Yes                  |         |
| FBgn0250788 | CG5870    | <i><math>\beta</math>-Spec</i> | Dp(1;3)DC537         | Yes               | W642X                                                    | Yes                  |         |
| FBgn0008635 | CG6223    | <i><math>\beta</math>Cop</i>   | Dp(1;3)DC346         | Yes               | S570F                                                    | Yes                  |         |
| FBgn0028969 | CG14813   | <i><math>\delta</math>COP</i>  | Dp(1;3)DC033         | Yes               | P395S                                                    | Yes                  |         |
| FBgn0024366 | CG11409   |                                | Dp(1;3)DC025         | Yes               | G719R                                                    | No                   |         |
| FBgn0024364 | CG11417   |                                | Dp(1;3)DC025         | Yes               | R103X ;<br>Q510X                                         | Yes                  |         |
| FBgn0030037 | CG12125   |                                | Dp(1;3)DC191         | Yes               | G34D                                                     | Yes                  |         |
| FBgn0030847 | CG12991   |                                | Dp(1;3)DC331         | Yes               | A245T                                                    | No                   |         |
| FBgn0029893 | CG14442   |                                | Dp(1;3)DC026         | Yes               | T755P                                                    | No                   |         |
| FBgn0027794 | CG14786   |                                | Dp(1;3)DC401         | Yes               | K313X                                                    | Yes                  |         |
| FBgn0030247 | CG15208   |                                | Dp(1;3)DC232         | Yes               | L318F                                                    | Yes                  |         |
| FBgn0029858 | CG15896   |                                | Dp(1;3)DC153         | Yes               | Y121D ;<br>W465R                                         | Yes                  |         |
| FBgn0030289 | CG1597    |                                | Dp(1;3)DC237         | Yes               | Y761N                                                    | Yes                  |         |
| FBgn0030321 | CG1703    |                                | Dp(1;3)DC241         | Yes               | Q641X                                                    | Yes                  |         |
| FBgn0030305 | CG1749    |                                | Dp(1;3)DC240         | Yes               | V178E ;<br>K298X                                         | Yes                  |         |
| FBgn0040899 | CG17776   |                                | Dp(1;3)DC039         | Yes               | Y21X                                                     | No                   |         |
| FBgn0025635 | CG17829   |                                | Dp(1;3)DC011         | Yes               | <b>W137X</b> ;<br>H253R                                  | Yes                  |         |
| FBgn0029971 | CG18624   |                                | Dp(1;3)DC494         | Yes               | X57L                                                     | Yes                  |         |
| FBgn0030344 | CG2025    |                                | Dp(1;3)DC245         | Yes               | K134X ;<br>W369X ;<br>Q376X                              | Yes                  |         |
| FBgn0023529 | CG2918    |                                | Dp(1;3)DC403         | Yes               | Q619X                                                    | Yes                  |         |
| FBgn0029823 | CG3011    |                                | Dp(1;3)DC146         | Yes               | M281R                                                    | Yes                  |         |
| FBgn0027564 | CG3149    |                                | Dp(1;3)DC142         | Yes               | A410V ;<br>W535X                                         | Yes                  |         |
| FBgn0052649 | CG32649   |                                | Dp(1;3)DC261         | Yes               | <b>W342X</b> ;<br>E623K ;<br>R629C                       | Yes                  |         |
| FBgn0040384 | CG32795   |                                | <i>Dp(1;3)DC050</i>  | Yes               | A196V                                                    | Yes                  |         |
| FBgn0085430 | CG34401   |                                | Dp(1;3)DC353         | Yes               | V193E ;<br>T295M ;<br>K407X ;<br><b>W946X</b>            | Yes                  |         |
| FBgn0029868 | CG3446    |                                | Dp(1;3)DC154         | Yes               | E82V                                                     | Yes                  |         |
| FBgn0040346 | CG3704    |                                | Dp(1;3)DC400         | Yes               | V124E ;<br>E300X                                         | Yes                  |         |
| FBgn0023520 | CG3857    |                                | Dp(1;3)DC034         | Yes               | L467V                                                    | Yes                  |         |
| FBgn0029798 | CG4078    |                                | Dp(1;3)DC143         | Yes               | V11E ;<br><b>W435X</b>                                   | Yes                  |         |
| FBgn0029763 | CG4165    |                                | Dp(1;3)DC137         | Yes               | splice donor<br>(5,317,784)                              | Yes                  |         |
