# Supplementary material for: Large-scale identification of chemically induced mutations in Drosophila melanogaster
Source: PubMed Central journal article supplement — Genome Res. 2014 Oct;24(10):1707–18. doi: 10.1101/gr.174615.114 (PMC4199363; doi:10.1101/gr.174615.114), 2014-10
Supplement: supp_gr.174615.114_REVSuppl_Table2_part5.pdf [file supp_gr.174615.114_REVSuppl_Table2_part5.pdf]

Supplemental Table 2

| Flybase ID  | CG number | Gene symbol | P[acman] duplication | first EMS allele? | Mutation                                            | Conserved in Humans? | Comment                                      |
|-------------|-----------|-------------|----------------------|-------------------|-----------------------------------------------------|----------------------|----------------------------------------------|
| FBgn0250862 | CG42237   |             | Dp(1;3)DC264         | Yes               | E361K                                               | No                   |                                              |
| FBgn0261803 | CG42749   |             | Dp(1;3)DC130         | Yes               | Q27X                                                | No                   | This gene is also known as<br><i>CG15786</i> |
| FBgn0030431 | CG4407    |             | Dp(1;3)DC217         | Yes               | D128N ;<br>D128N and<br>V205G ;<br>W239X ;<br>E314V | Yes                  |                                              |
| FBgn0029906 | CG4542    |             | Dp(1;3)DC163         | Yes               | W350R                                               | Yes                  |                                              |
| FBgn0030091 | CG7065    |             | Dp(1;3)DC204         | Yes               | K327X ;<br>Q333X                                    | No                   |                                              |
| FBgn0030974 | CG7358    |             | Dp(1;3)DC354         | Yes               | N782S ;<br>L730X                                    | Yes                  |                                              |
| FBgn0030674 | CG8184    |             | Dp(1;3)DC304         | Yes               | T1107I ;<br><b>A1692V</b>                           | Yes                  |                                              |
| FBgn0029939 | CG9650    |             | Dp(1;3)DC415         | Yes               | splice donor<br>(7,127,264)                         | Yes                  |                                              |
