# Supplementary material for: Large-scale identification of chemically induced mutations in Drosophila melanogaster
Source: HighWire-hosted journal article supplement (doi:10.1101/gr.174615.114), 2014-09-25
Supplement: Supplemental_Legends.docx [file Supplemental_Legends.docx]

**Supplemental Figure 1: Duplication mapping.** (A) Collection of 1-2 Mb duplications that were used for duplication mapping. Duplicated regions are translocated from the *X* chromosome to either the *Y* chromosome (Dp(1;*Y*)), autosomes (Dp(1;A)), or are free-floating chromosome fragments (Dp(1;f)). (B) Schematic diagram of the array CGH strategy to determine the molecular coverage of 12 duplications. Duplication 901 is shown as an example. Male flies with a wild type *X* chromosome and an additional duplication (*Dp(1;Y)*) are obtained through a cross. By comparing the copy number variation of part of the *X* chromosome using a microarray, one can determine the molecular coverage of the duplicated segment. The area that is enriched approximately 2 fold is the duplicated segment (C) Molecular characteristics of the duplications, shown in (A).

**Supplemental Table 1: list of *X* chromosome genes embedded in the ΔXscreen filter.** Listed are the97 genes (~5% of the *X* chromosome genes) that contained the most SNVs per sequencing reaction. The majority of these genes contain ≥1 SNV per sequenced genome and are therefore unlikely to represent true candidate mutations. We excluded these 97 genes from analysis.

**Supplemental Table 2: Complete list of *X* chromosome mutations identified through WGS and validated by 80 kb P[acman] dp rescue and / or complementation tests.** For 76% of the identified genes, no pre-existing lethal EMS-mutations are available. Mutation characterization. When the mutation is not underlined or bolded, the allele can be rescued by the corresponding P[acman] duplication. When the mutation is underlined and bolded, the allele cannot be rescued by the corresponding P[acman] duplication and the chromosome most likely carries another lethal mutation. When the mutation is underlined, we were unable to identify a P[acman] duplication that rescued the lethal allele. The latter 2 categories of alleles were mapped by performing complementation tests with pre-existing lethal alleles (see Comment).

**Supplemental Figure 2: Comparison of WGS-strategies to map two alleles of one complementation group under different conditions.** When the same filters that are explained in Figure 4 are applied to 2 alleles of the same complementation group, only 1.7 genes per *X* chromosome contain an SNV in both analyzed genomes (A). Suggested filtering process to map 2 alleles of a pre-existing screen using WGS (B). Alternative strategy. First, the background-specific SNVs that are identical between both sequenced alleles are filtered out (background). Next, only non-synonymous SNVs or SNVs that affect splicing are retained (functional). Finally, we replaced the technical filter from (A) by removing genes that either contained ≥3 SNVs per sequenced *X* chromosome or that had a low genome mappability score. Filtering the SNVs of both sequenced alleles with this set of filters yielded on average 3.5 candidate genes per complementation group.

**Supplemental Figure 3: Strategy to apply WGS to identify chemically induced mutations.** Forward genetic screens should be initiated with an isogenized chromosome that is treated with a low dose of mutagen, since this will facilitate mapping. Upon screening for a phenotype of interest, the mutants should be mapped to ~1.5 Mb. For the *X* chromosome, this can be done with duplication mapping. For autosomes, we recommend *P*-element mapping. Integrating the information obtained from rough mapping with the SNVs identified through WGS results in ~1-3 candidate mutations per 1.5 Mb. Rescue experiments with small duplications or complementation tests with small deficiencies will lead to the isolation of the phenotype-causing mutation.
