# Supplementary figures and images for: Large-scale identification of chemically induced mutations in Drosophila melanogaster
Source: PubMed Central journal article supplement — Genome Res. 2014 Oct;24(10):1707–18. doi: 10.1101/gr.174615.114 (PMC4199363; doi:10.1101/gr.174615.114), 2014-10

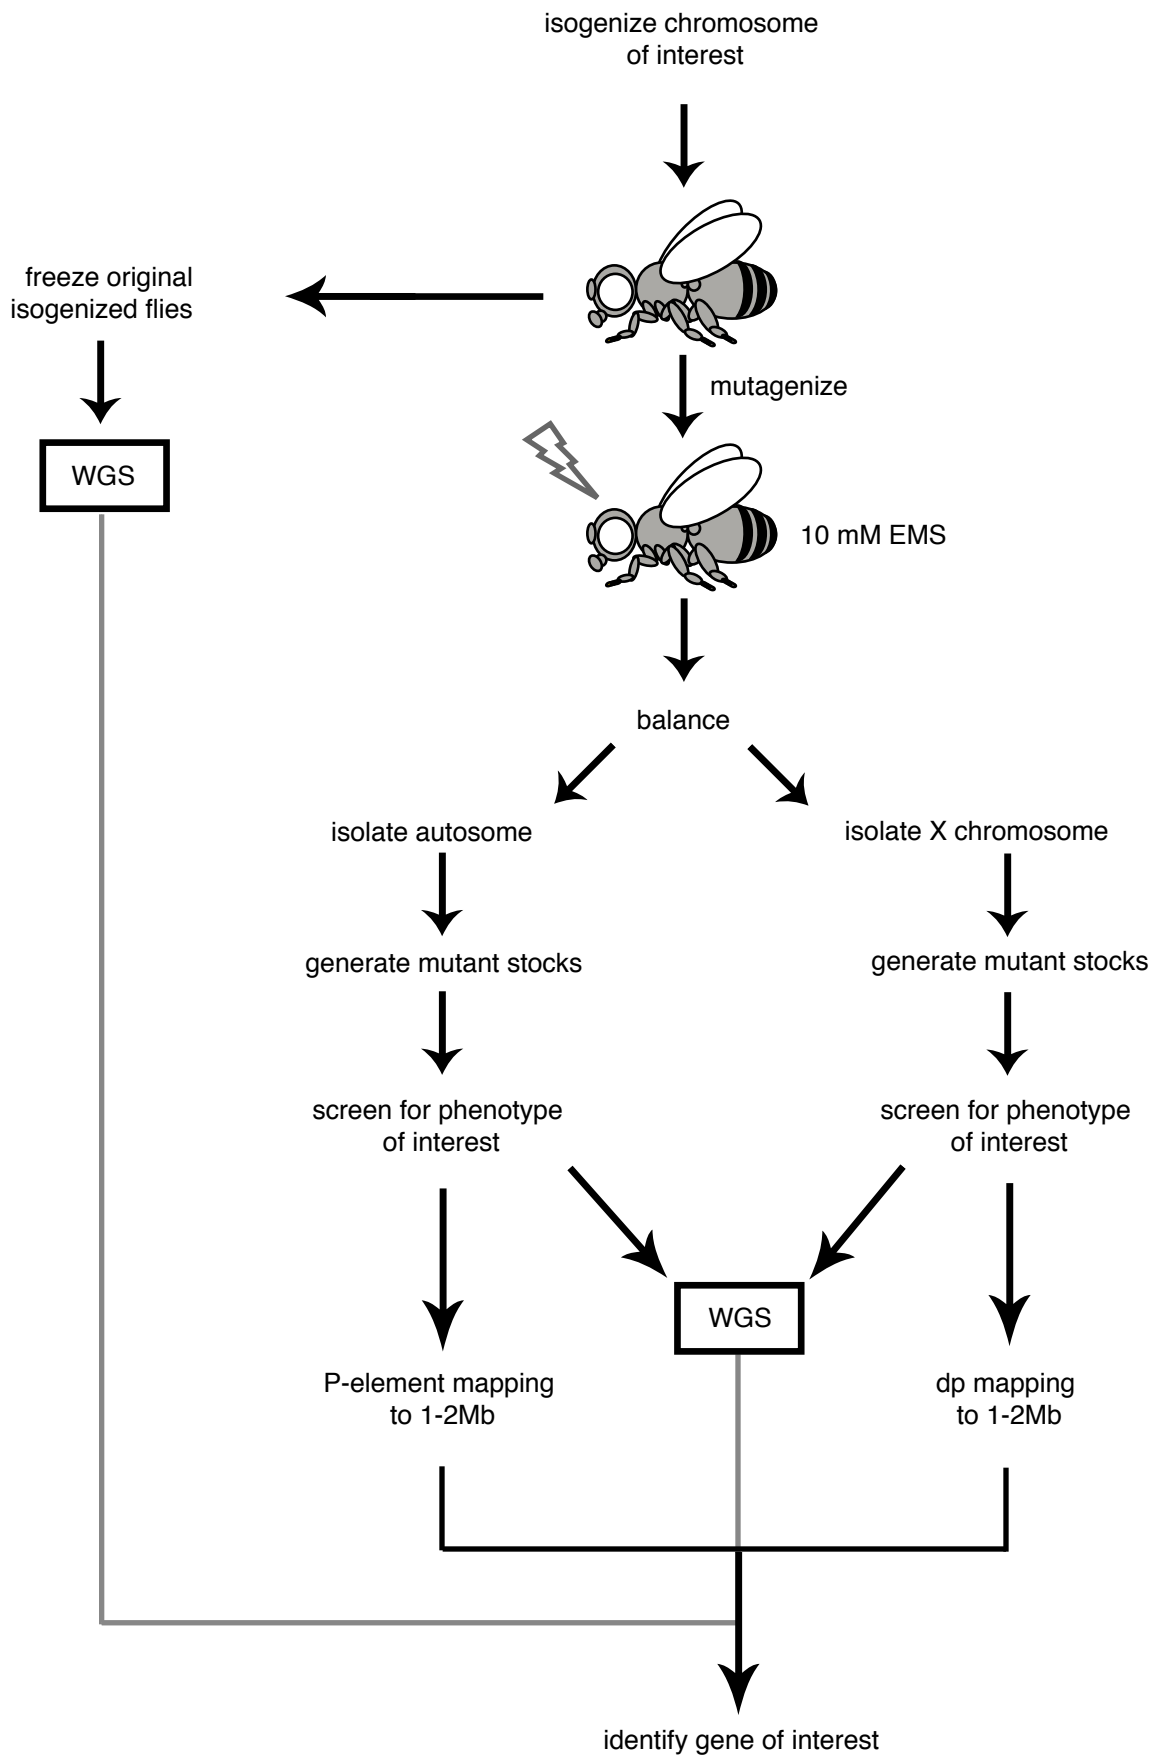

Supplement: supp_gr.174615.114_REVHaelterman174615_Suppl_Fig3.pdf [file supp_gr.174615.114_REVHaelterman174615_Suppl_Fig3.pdf]

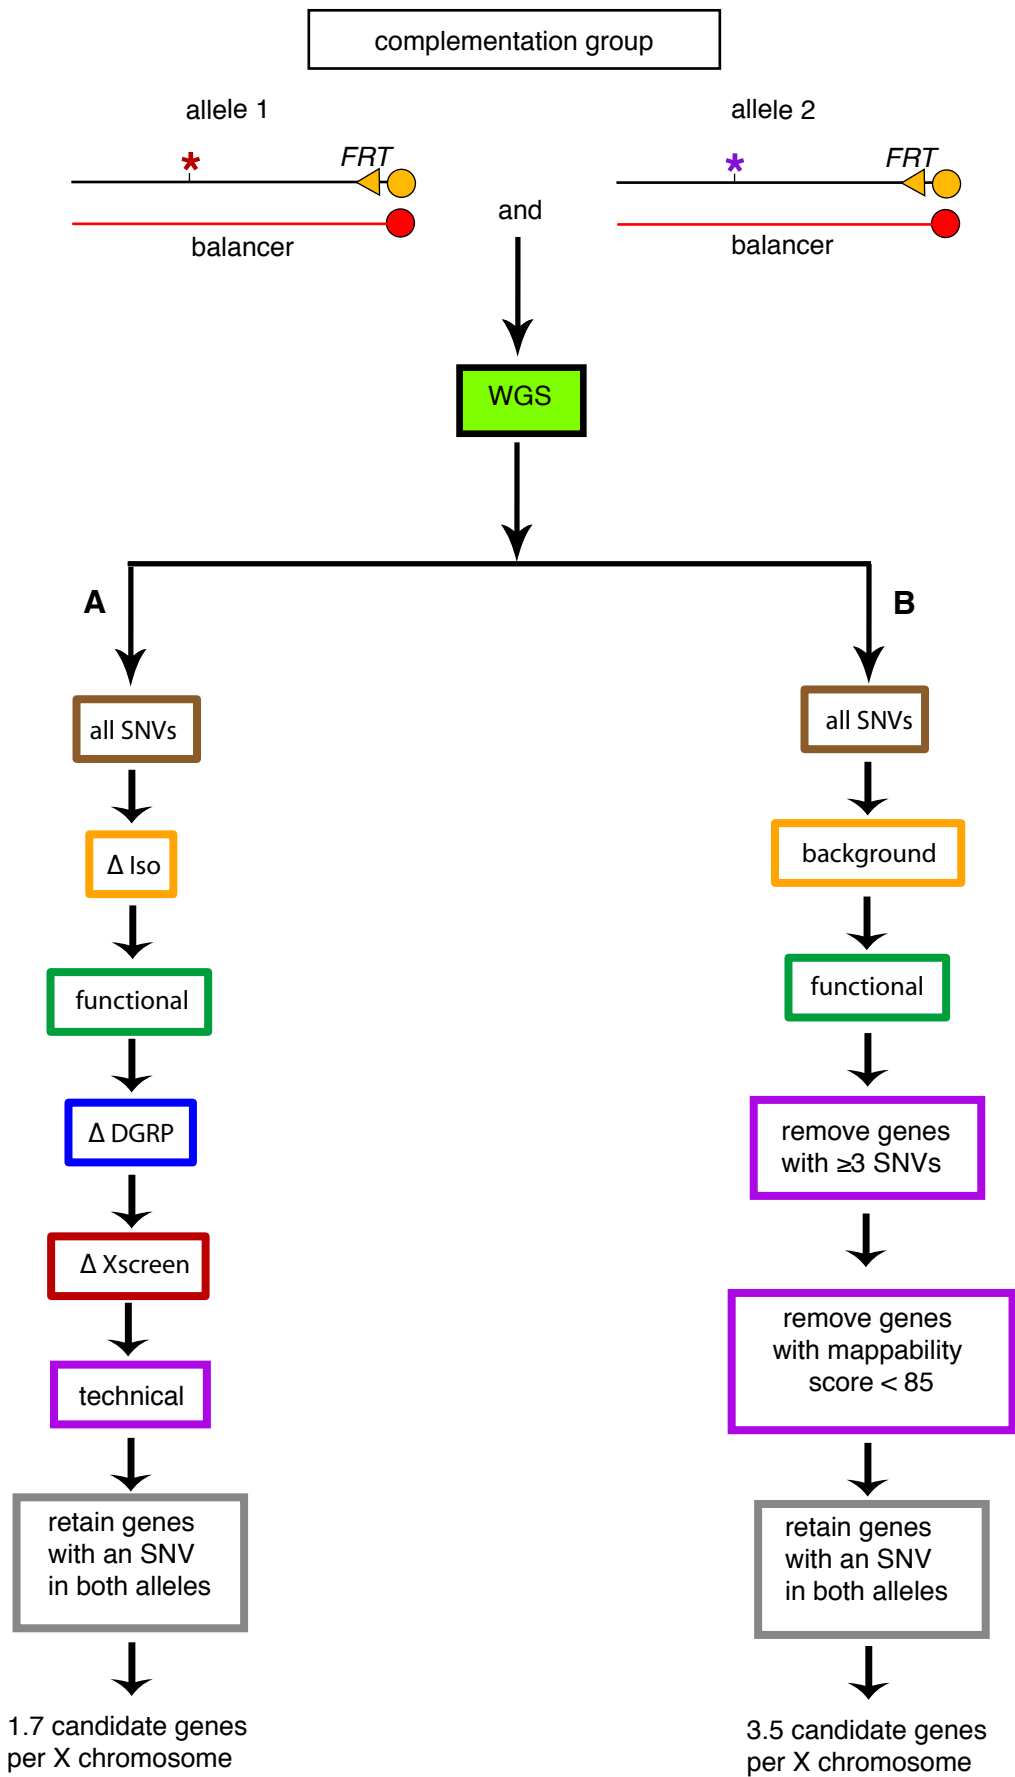

Supplement: supp_gr.174615.114_REVSuppl_Figure-2.pdf [file supp_gr.174615.114_REVSuppl_Figure-2.pdf]
